# Supplementary material
Source: MDPI journal article supplement (https://www.mdpi.com/2673-4583/10/1/17)

# Antioxidant Capacity with Physical Property Variations of *Morinda citrifolia* L. Juice in Traditional Fermentation

Eng. (Mrs.) Malsha H. Samarasiri  
Eng. Diunuge B. Wijesinghe

Eng. Thushitha A. Chandrasiri,  
Prof. (Mrs.) Sanja P. Gunawardena

---

*Department of Chemical & Process Engineering | Department of Computer Science & Engineering*  
*University of Moratuwa, Sri Lanka*

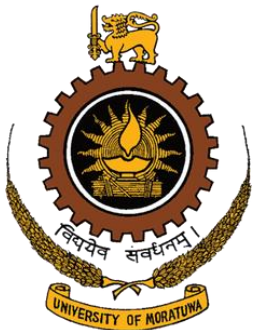

# Outline of Presentation

---

- ❖ Background
- ❖ Research problem
- ❖ Objectives
- ❖ Methodology
- ❖ Results
- ❖ Conclusions
- ❖ References

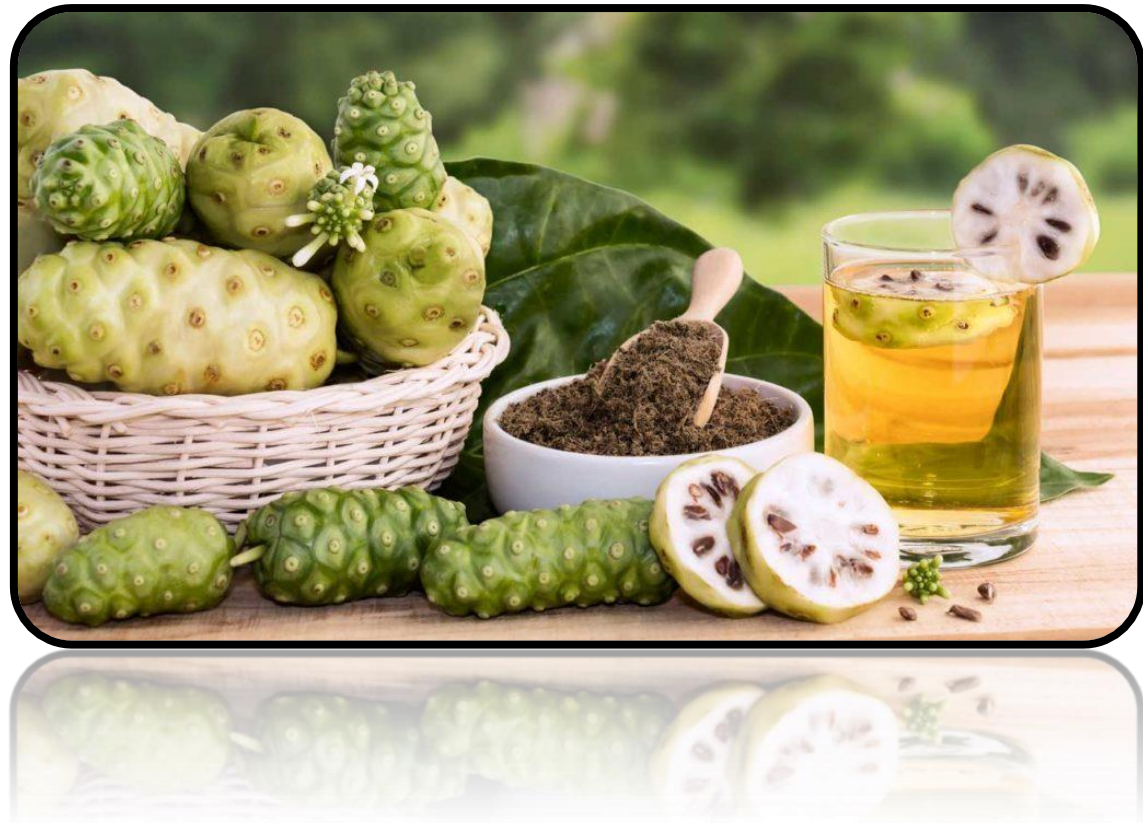

# Noni (*Morinda citrifolia* L.) Fruit

---

Unripe fruit – hard & bright green

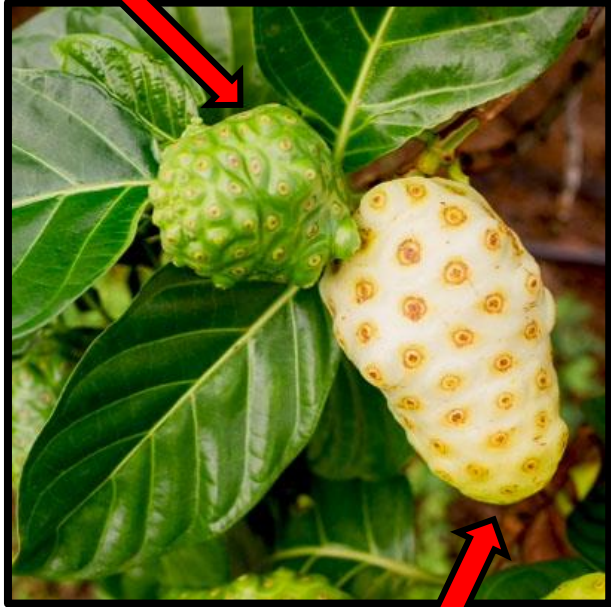

Noni juice

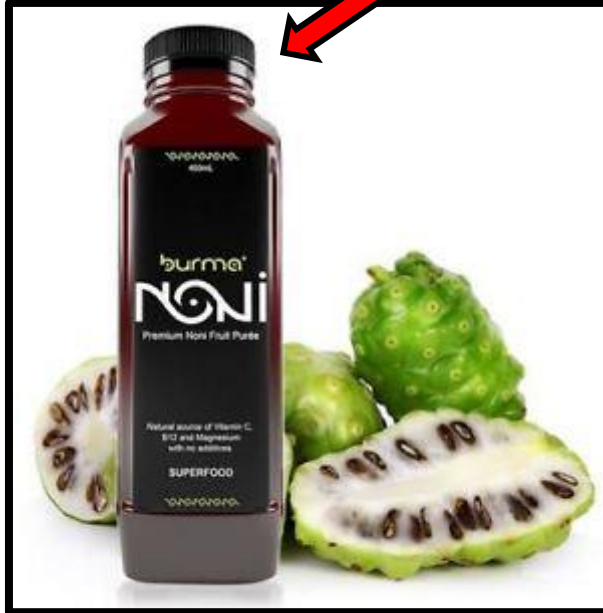

Ripe fruit – translucent & white/yellowish

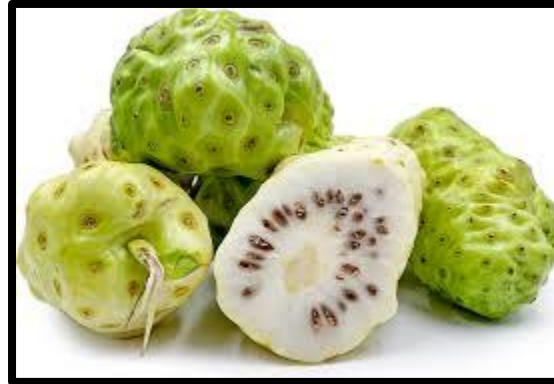

One of underutilized fruits

# Introduction

---

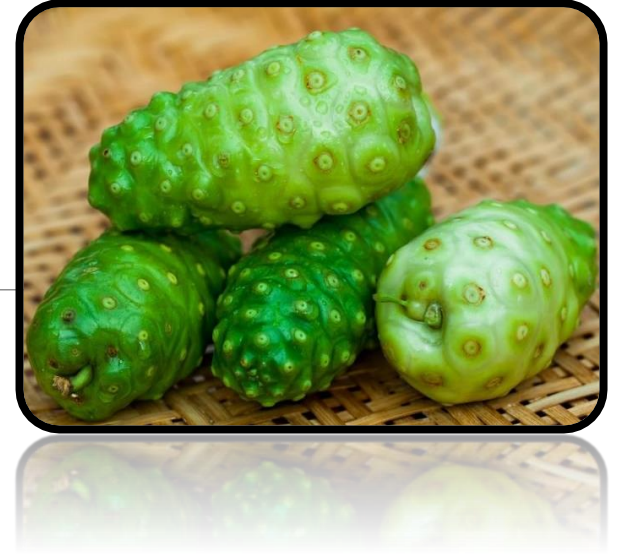

- ❖ Amazing **therapeutic & nutritional value**.
- ❖ Contains **phytochemicals** to prevent/cure diseases.
- ❖ Studying variation of physical parameters during traditional fermentation of noni juice (**pH & temperature of juice, temperature & humidity of fermenter & juice level**).
- ❖ Identifying correlations between these physical properties with antioxidant capacity of noni juice.

# Research Problem

---

❖ Popular method for noni juice production - **traditional fermentation** (Usually **2 months**).

❖ How **physical parameters** vary with this time in fermentation of noni juice?

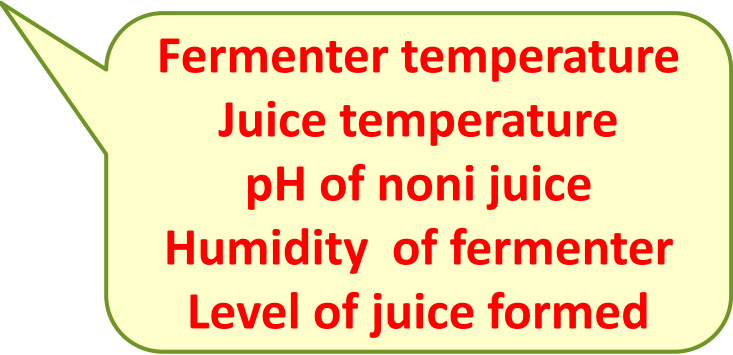

Fermenter temperature  
Juice temperature  
pH of noni juice  
Humidity of fermenter  
Level of juice formed

❖ **Antioxidant capacity** of noni juice varies with the fermentation conditions. How is it **correlated** with the above physical properties?

# Objectives

---

- ❖ Determine whether there are significant variations of physical parameters with fermentation time.
- ❖ Determine whether there are any significant correlations between physical parameters and antioxidant capacity of noni juice.

# Methodology

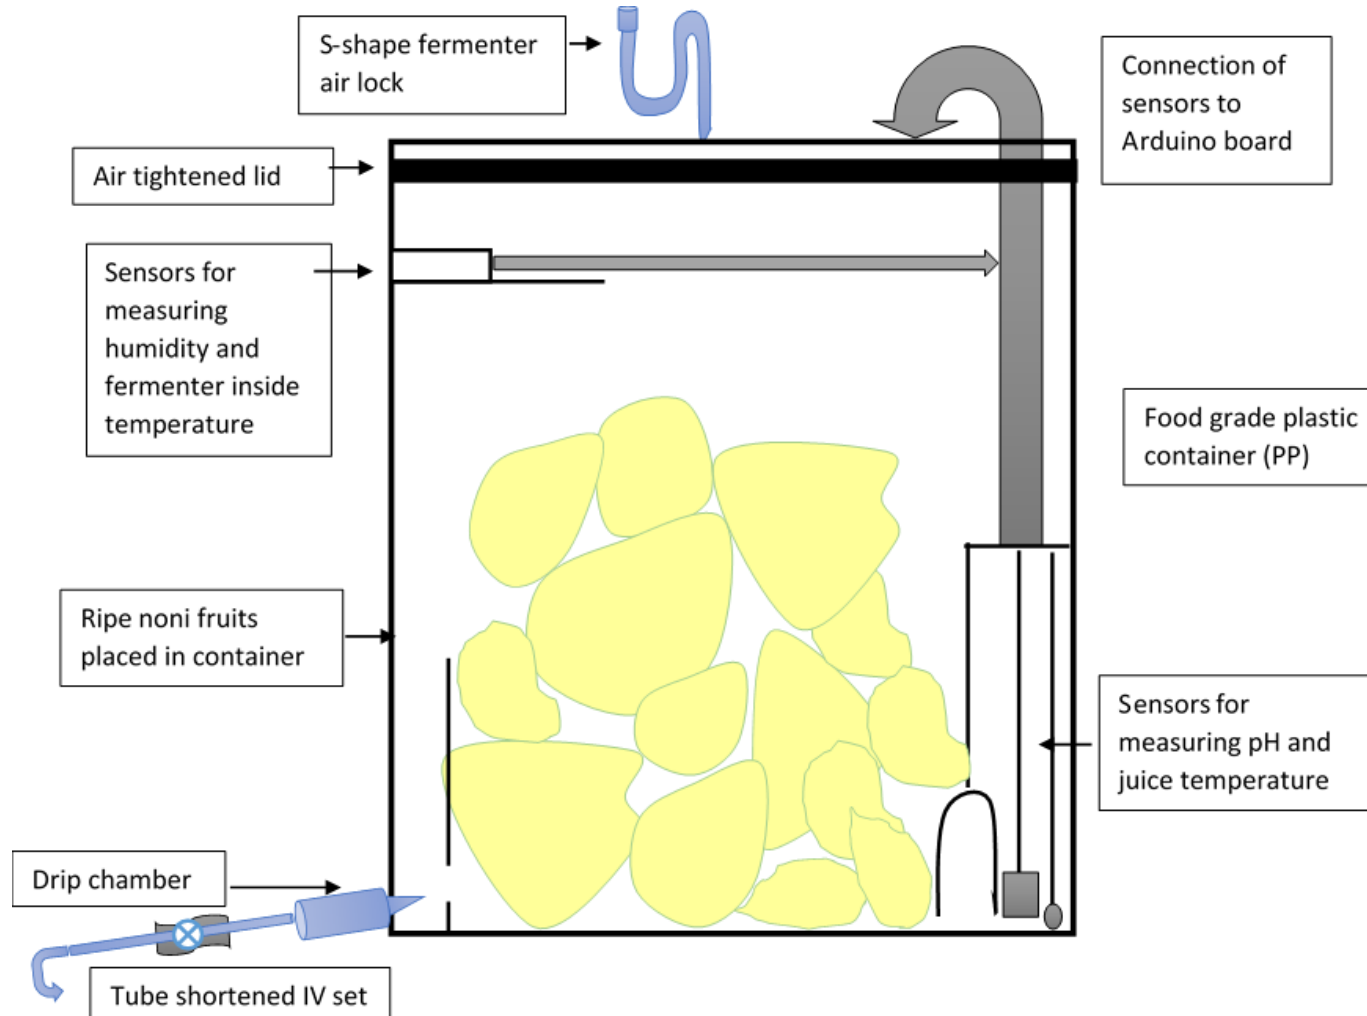

**Schematic Diagram of the Fermenter**

# Fermenter Setup

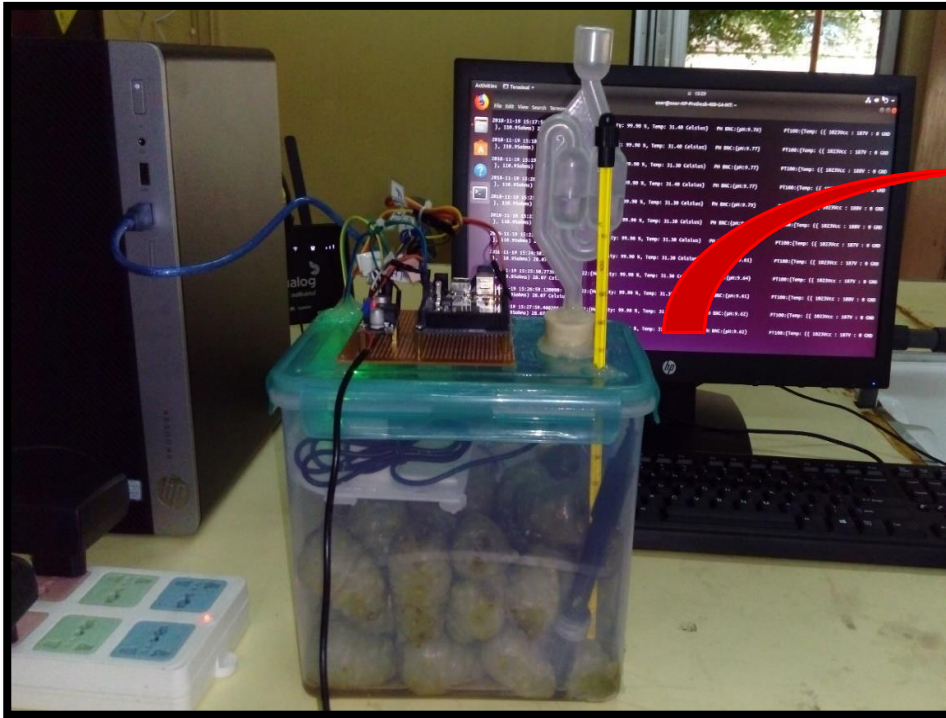

**After installing & starting execution of the coded program.**

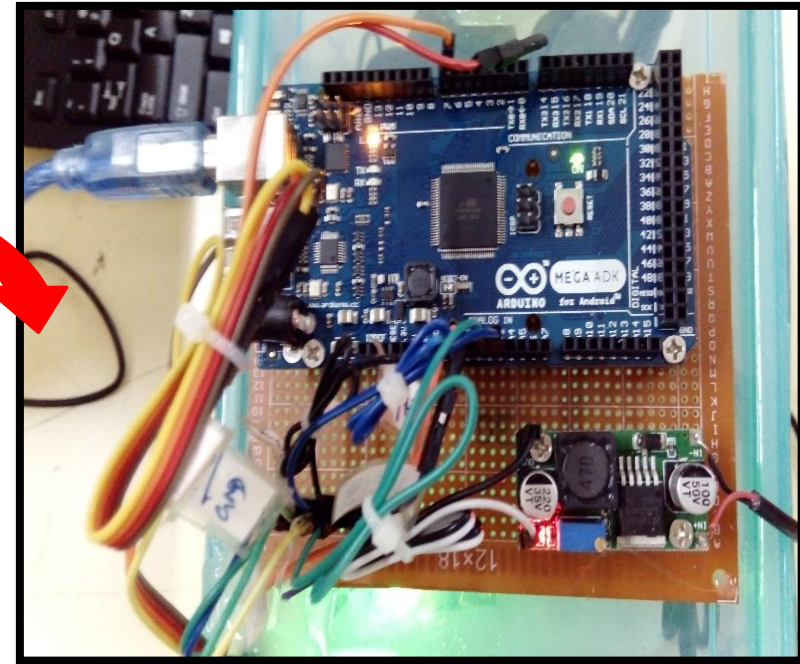

**Arduino MEGA 2560 microcontroller board connected with sensors & attached to the top surface of the fermenter.**

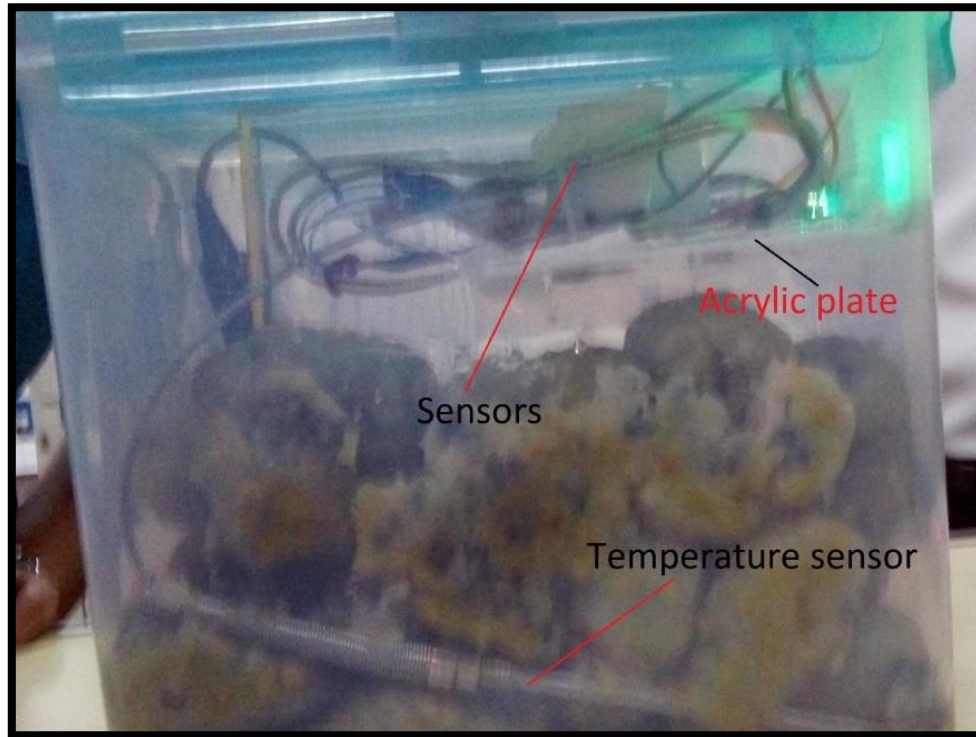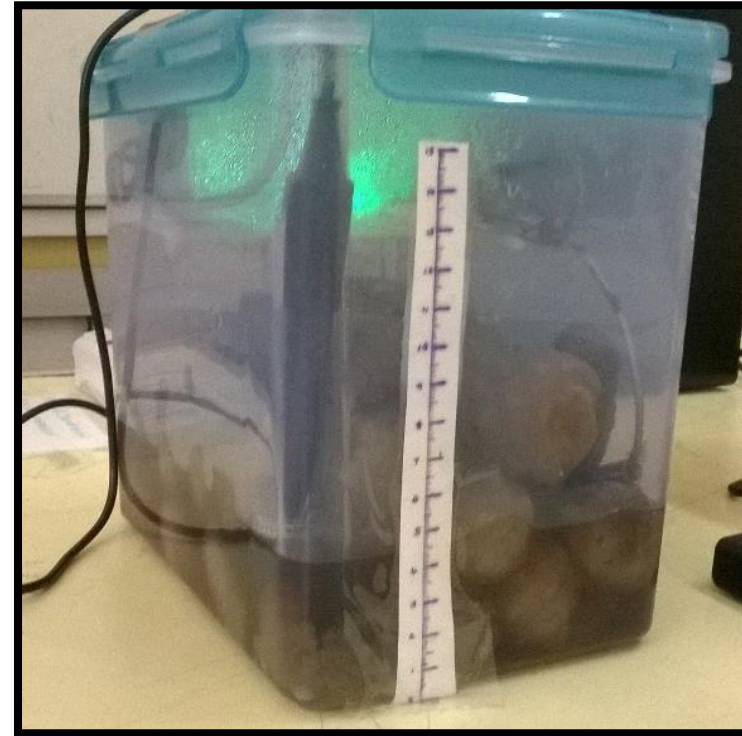

❖ Determining variations of physical properties during traditional fermentation of noni juice is important.

# Top View of the Fermenter

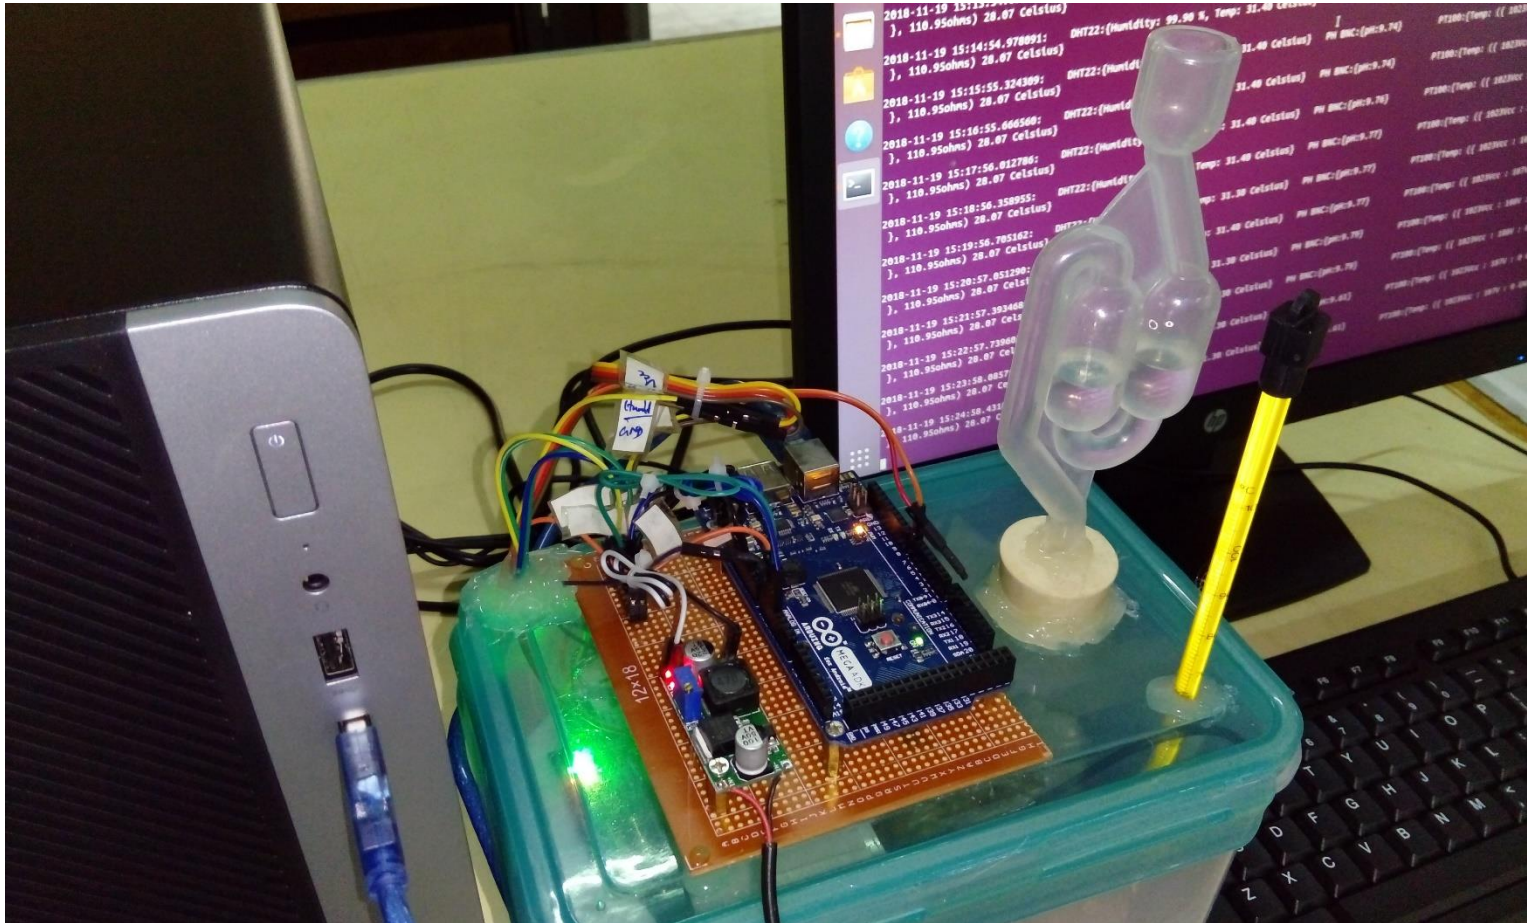

```
Activities Terminal
File Edit View Search Terminal Help
user@user-HP-ProDesk-400-G4-MT: ~
11:25
2018-12-27 11:14:16.119213: DHT22:{Humidity: 99.90 %, Temp: 30.50 Celsius} PH BNC:{pH:8.13} PT100:{Temp: ({ 1023Vcc : 51V : 0 GND
}, 25.49ohms) -191.06 Celsius}
2018-12-27 11:15:16.465131: DHT22:{Humidity: 99.90 %, Temp: 30.50 Celsius} PH BNC:{pH:8.12} PT100:{Temp: ({ 1023Vcc : 51V : 0 GND
}, 25.49ohms) -191.06 Celsius}
2018-12-27 11:16:16.807902: DHT22:{Humidity: 99.90 %, Temp: 30.50 Celsius} PH BNC:{pH:8.11} PT100:{Temp: ({ 1023Vcc : 51V : 0 GND
}, 25.49ohms) -191.06 Celsius}
2018-12-27 11:17:17.148887: DHT22:{Humidity: 99.90 %, Temp: 30.60 Celsius} PH BNC:{pH:8.13} PT100:{Temp: ({ 1023Vcc : 51V : 0 GND
}, 25.49ohms) -191.06 Celsius}
2018-12-27 11:18:17.494777: DHT22:{Humidity: 99.90 %, Temp: 30.60 Celsius} PH BNC:{pH:8.13} PT100:{Temp: ({ 1023Vcc : 51V : 0 GND
}, 25.49ohms) -191.06 Celsius}
2018-12-27 11:19:17.836645: DHT22:{Humidity: 99.90 %, Temp: 30.60 Celsius} PH BNC:{pH:8.13} PT100:{Temp: ({ 1023Vcc : 51V : 0 GND
}, 26.02ohms) -189.68 Celsius}
2018-12-27 11:20:18.178538: DHT22:{Humidity: 99.90 %, Temp: 30.60 Celsius} PH BNC:{pH:8.13} PT100:{Temp: ({ 1023Vcc : 51V : 0 GND
}, 26.02ohms) -189.68 Celsius}
2018-12-27 11:21:18.524423: DHT22:{Humidity: 99.90 %, Temp: 30.70 Celsius} PH BNC:{pH:8.12} PT100:{Temp: ({ 1023Vcc : 51V : 0 GND
}, 25.49ohms) -191.06 Celsius}
2018-12-27 11:22:18.866311: DHT22:{Humidity: 99.90 %, Temp: 30.70 Celsius} PH BNC:{pH:8.12} PT100:{Temp: ({ 1023Vcc : 51V : 0 GND
}, 25.49ohms) -191.06 Celsius}
2018-12-27 11:23:19.212191: DHT22:{Humidity: 99.90 %, Temp: 30.70 Celsius} PH BNC:{pH:8.12} PT100:{Temp: ({ 1023Vcc : 51V : 0 GND
}, 25.49ohms) -191.06 Celsius}
2018-12-27 11:24:19.553929: DHT22:{Humidity: 99.90 %, Temp: 30.70 Celsius} PH BNC:{pH:8.13} PT100:{Temp: ({ 1023Vcc : 51V : 0 GND
}, 25.49ohms) -191.06 Celsius}
2018-12-27 11:25:19.895971: DHT22:{Humidity: 99.90 %, Temp: 30.80 Celsius} PH BNC:{pH:8.13} PT100:{Temp: ({ 1023Vcc : 51V : 0 GND
}, 25.49ohms) -191.06 Celsius}
```

**After installing & starting execution of the coded program.**

# Sensors Used to Measure the Physical Properties

---

❖ Temperature of the fermenting juice :

**PT100 RTD with Thermometer Sensor**

❖ pH of the fermenting juice :

**Liquid PH Detect Sensor Module + PH Electrode Probe BN Arduino**

❖ Temperature & humidity in the fermenter:

**DHT22/AM2302 Digital Temperature and Humidity Sensor**

❖ Level of formed noni juice : **Reading manually**

# Variation of Antioxidant Capacity of Noni Juice

---

- ❖ Measuring antioxidant capacity (AC) of noni juice every week for 2 months.
- ❖ Determining AC by scavenging of DPPH free radicals as explained by Brand-Williams.
- ❖ Determination of remaining DPPH concentrations in noni juice by using an experimentally derived standard curve of DPPH concentration vs absorbance

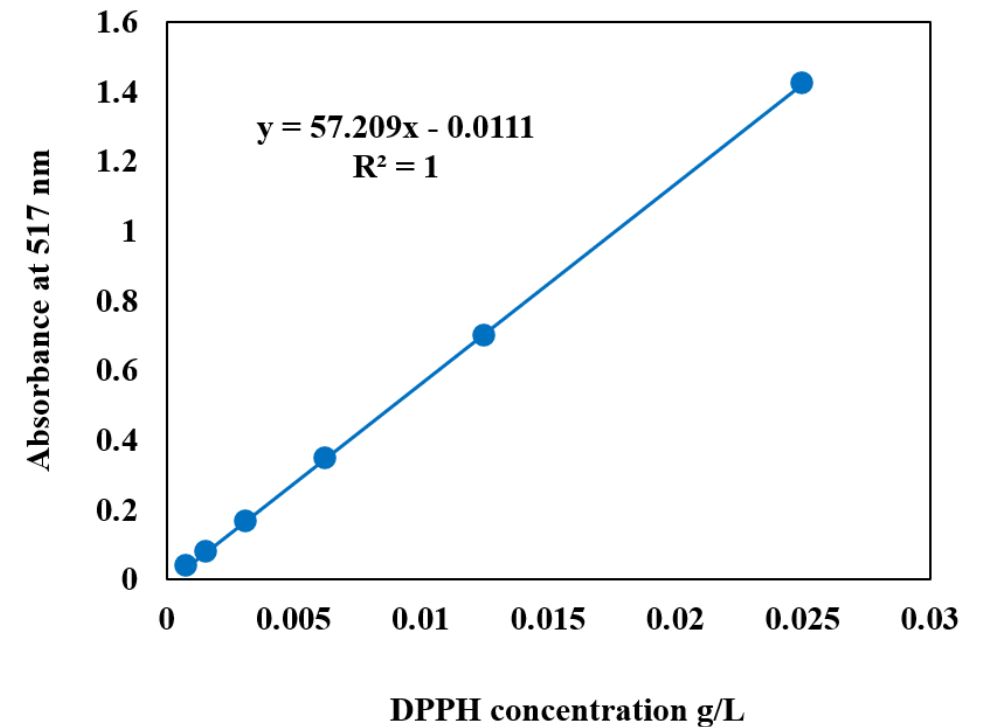

# Correlation of Physical Properties and Antioxidant Capacity of Noni Juice

---

- ❖ Average data of these physical properties of noni juice were then analysed for their correlations with antioxidant capacity of noni juice.
- ❖ Correlation was determined by calculating Distance Correlation Coefficients for the obtained data.
- ❖ Distance Correlation or Distance Covariance is a measure of dependence between two paired random vectors of arbitrary, not necessarily equal, dimension.

# Mathematical Equations Used for Correlation Calculation

1

$$a_{j,k} = \|X_j - X_k\| \quad j, k = 1, 2, 3, \dots, n$$

2

$$b_{j,k} = \|Y_j - Y_k\| \quad j, k = 1, 2, 3, \dots, n$$

3

$$A_{j,k} \equiv a_{j,k} - a_j - a_k + \bar{a}$$

4

$$B_{j,k} = b_{j,k} - b_j - b_k + \bar{b}$$

5

$$v_n^2(X, Y) = \frac{1}{n^2} \sum_{j,k=1}^n A_{j,k} \times B_{j,k}$$

6

$$v_n^2(X) = \frac{1}{n^2} \sum_{j,k=1}^n A_{j,k}^2$$

7

$$v_n^2(Y) = \frac{1}{n^2} \sum_{j,k=1}^n B_{j,k}^2$$

8

$$R_n^2(X, Y) = \frac{v_n^2(X, Y)}{\sqrt{v_n^2(X) \times v_n^2(Y)}}$$

# Calculation of Distance Correlation Coefficients

---

Distance correlations of each physical property with antioxidant capacity were calculated as follows.

- ❖ Calculating  $n$  by  $n$  distance matrices ( $a_{j,k}$ ) and ( $b_{j,k}$ ) containing all pairwise distances by 1 & 2.
  - $a_{j,k}$  matrices - for each physical property &  $b_{j,k}$  matrix - for antioxidant capacity
- ❖ Computing all doubly centered distances by 3 & 4 for computed distance matrices.
- ❖ Calculating squared sample distance covariance by 5.
- ❖ Calculating corresponding squared sample variances by 6 & 7.
- ❖ Computing distance correlation ( $R_n(X,Y)$ ) of two random vectors by dividing their distance covariance by the product of their distance standard deviations by 8.

# Results

## Variations of physical properties during traditional fermentation of noni juice

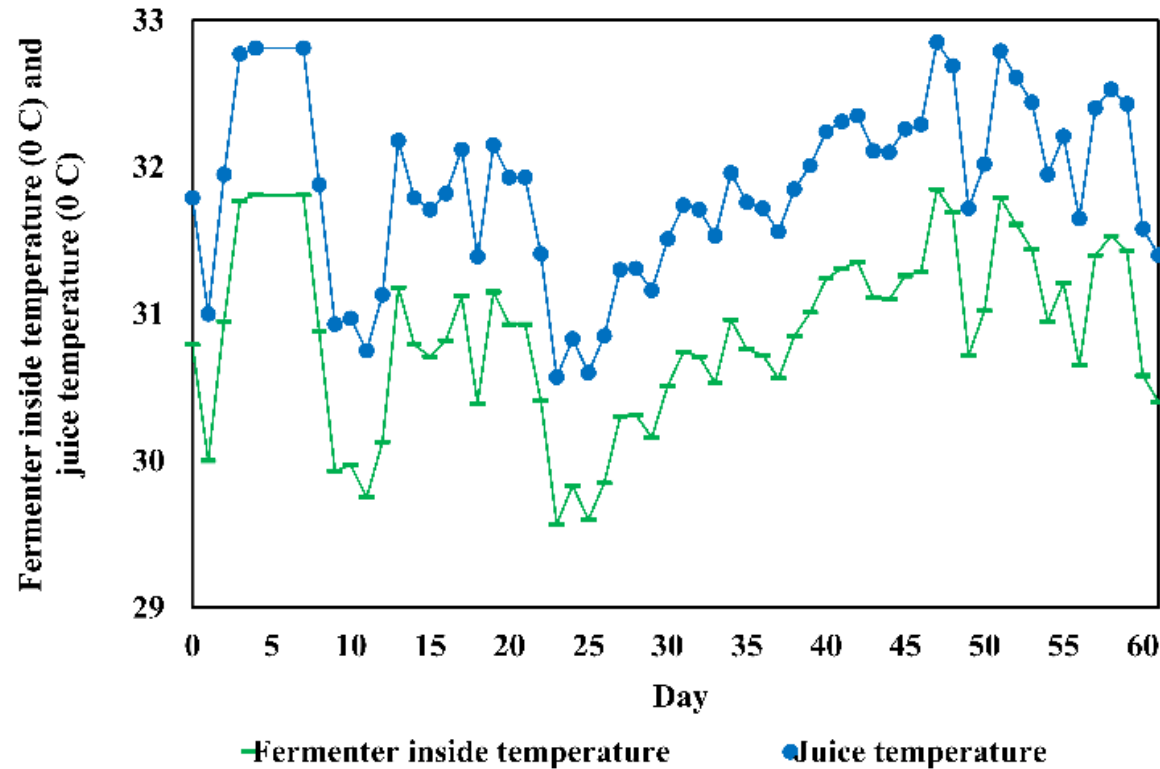

Variations of juice temperature & fermenter inside temperature

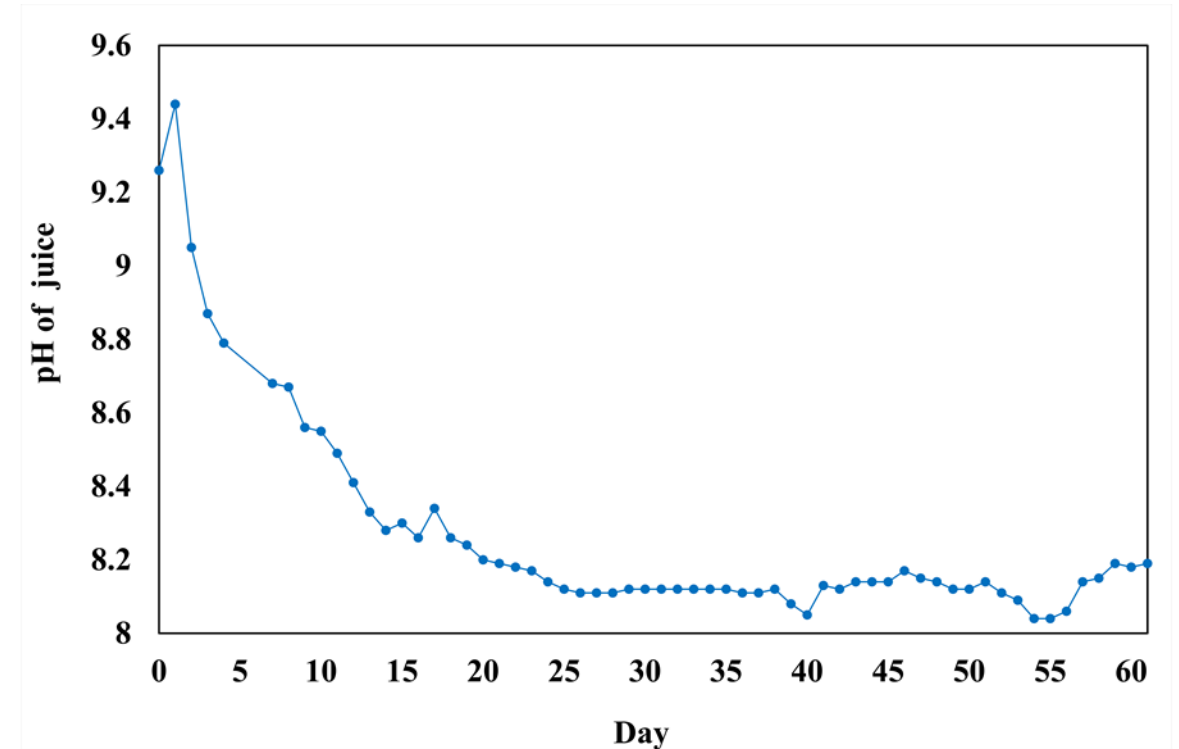

Variation of pH of noni juice

## Variations of physical properties during traditional fermentation of noni juice

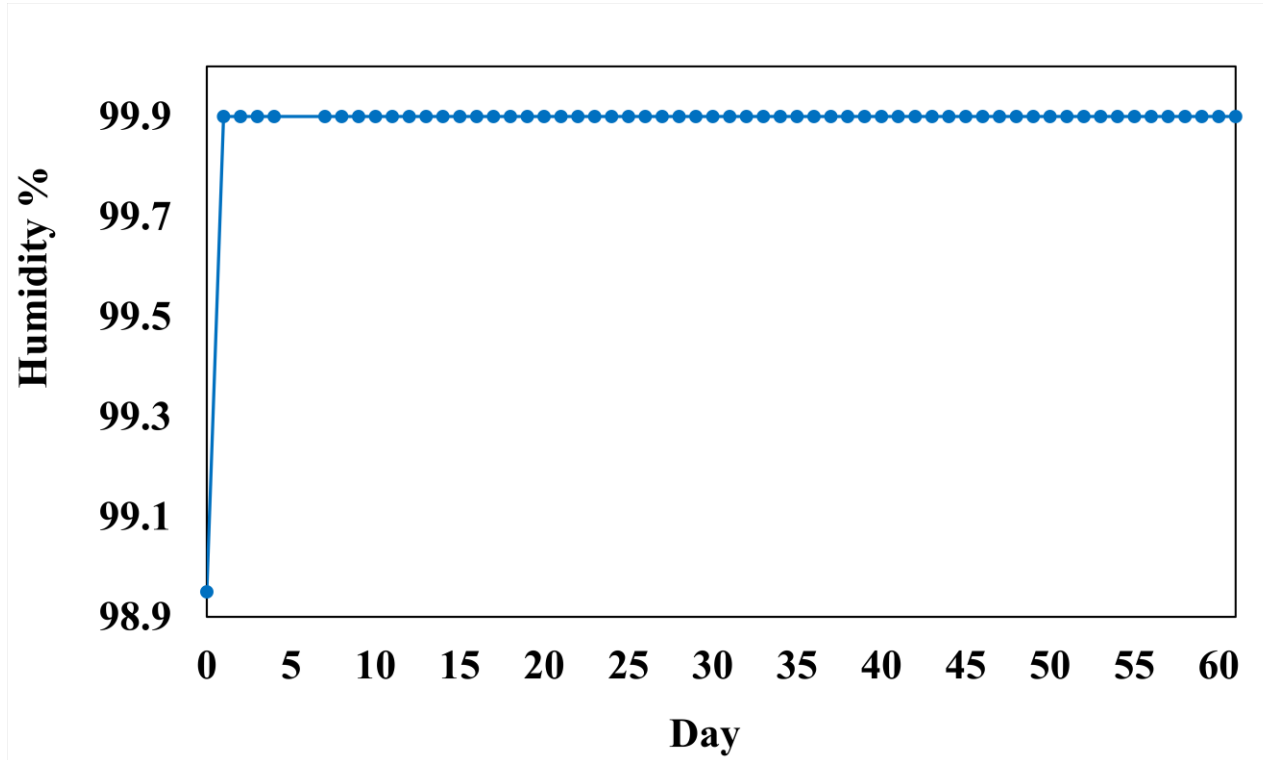

Variations of humidity within fermenter

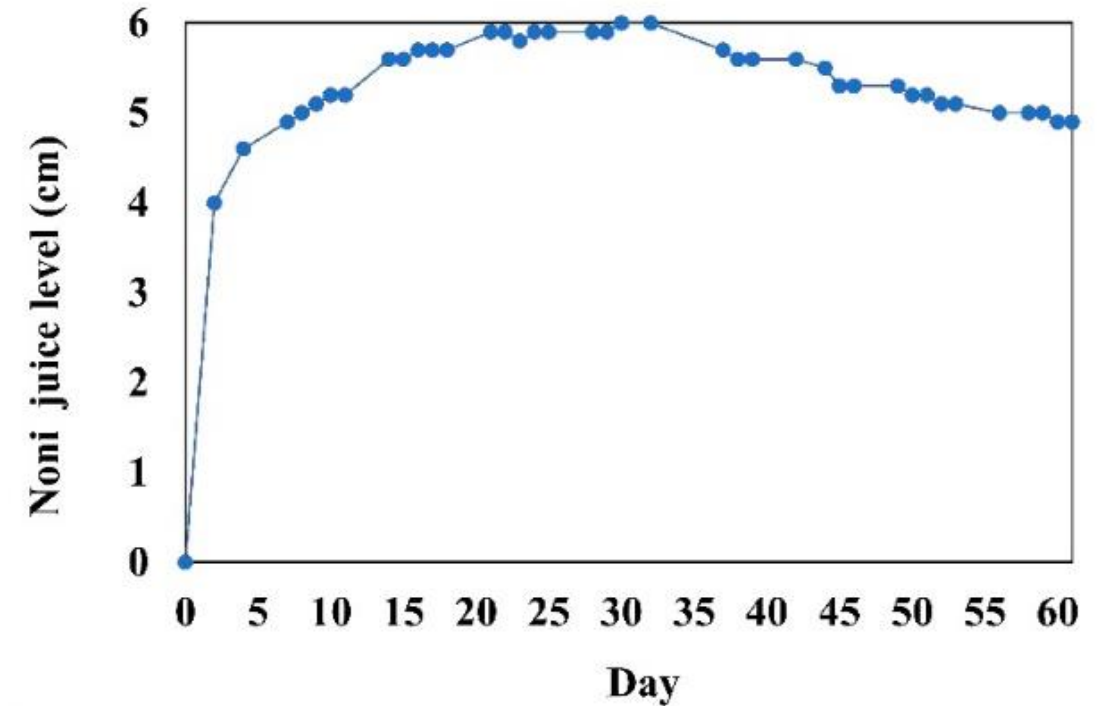

Variations of noni juice level

## Variation of antioxidant capacity of noni juice during traditional fermentation

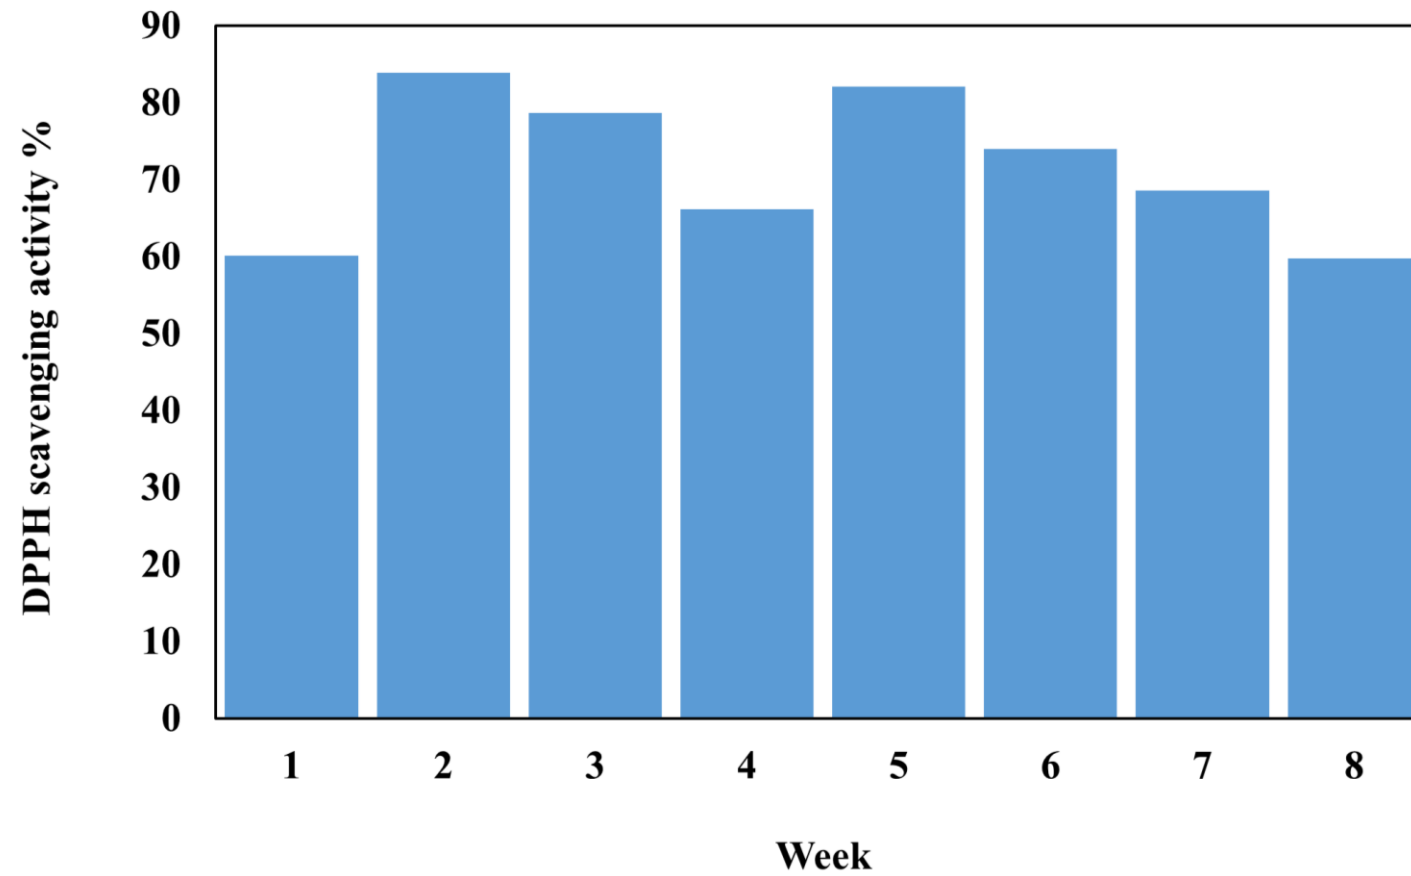

## Distance correlation coefficients of physical properties of traditional fermentation of noni juice with its antioxidant capacity.

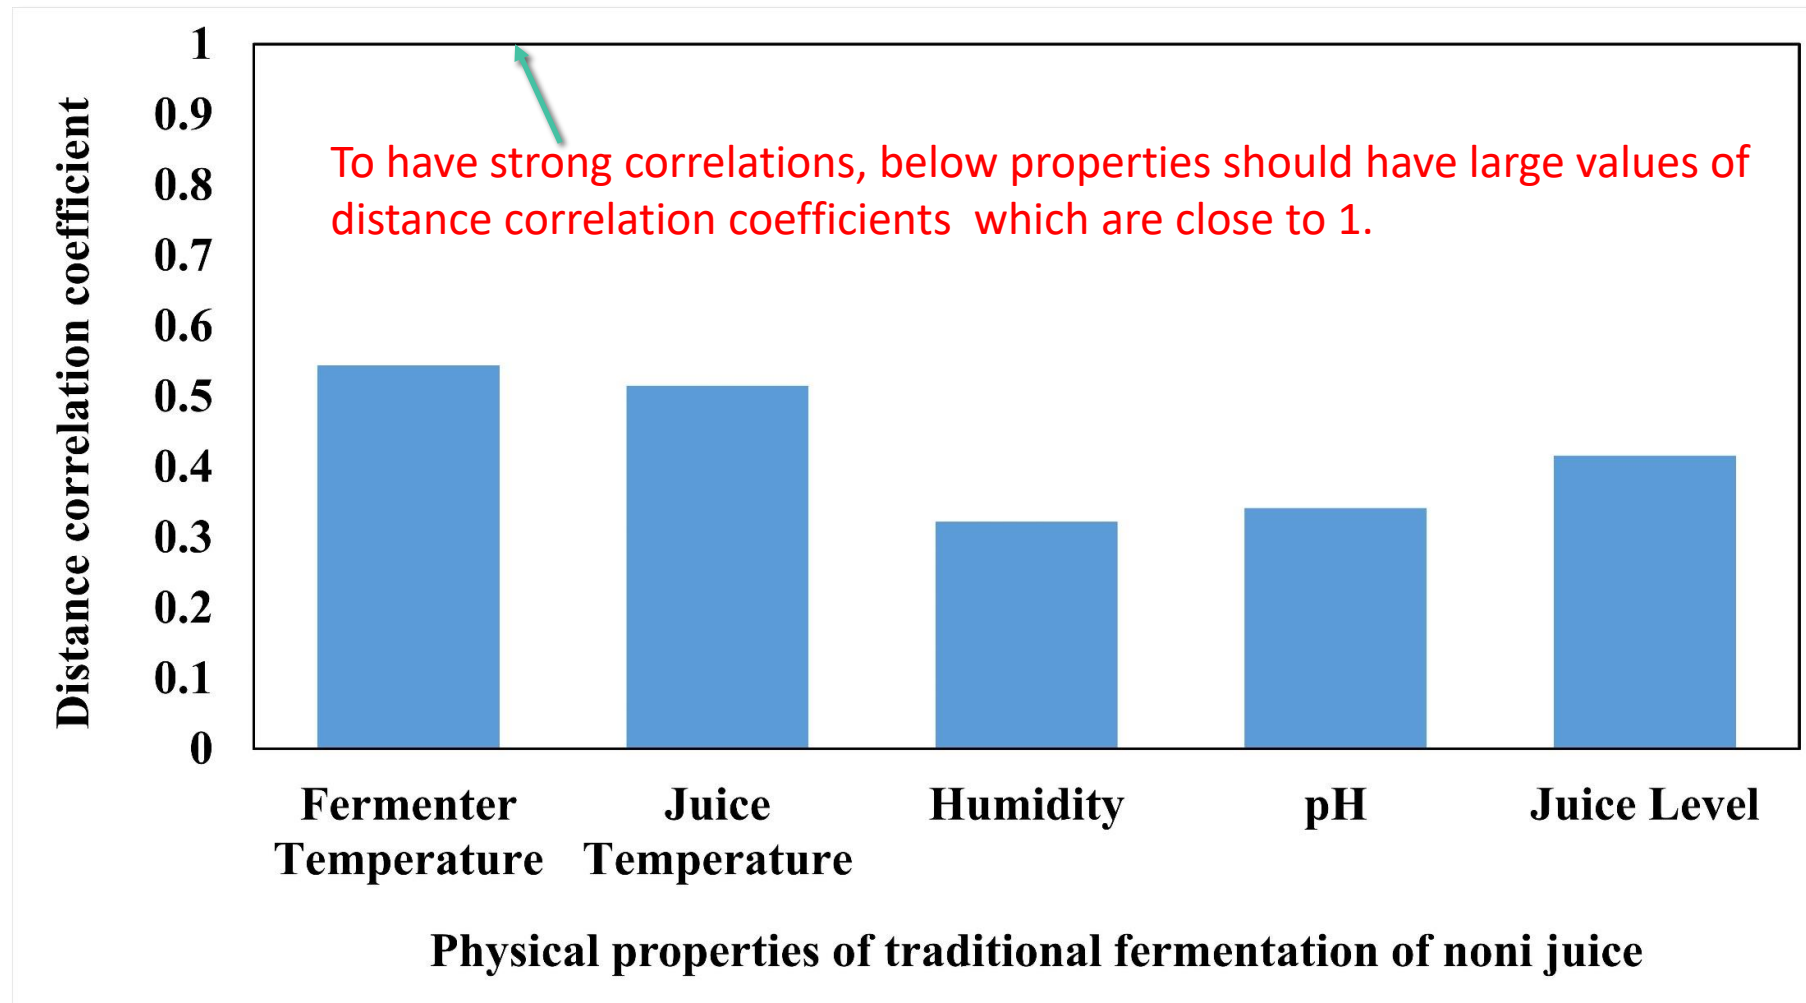

# Conclusions

---

- ❖ Strong correlations did not exist in each physical parameter with the antioxidant capacity of noni juice.
- ❖ Patterns of variations of physical properties during traditional fermentation of noni juice were different from the variation of antioxidant capacity which was maximum at 2<sup>nd</sup> week of traditional fermentation.

# References

1. Meilawati, L.; Ernawati, T.; Dewi, R.; Megawati, M. and Sukirno, S. Study of Total Phenolic, Total Flavonoid, Scopoletin Contents and Antioxidant Activity of Extract of Ripened Noni Juice. *Jurnal Kimia Terapan Indonesia* 2021, 23, 55-62.
2. Krishnaiah, D.; Bono, A.; Sarbatly, R.; Anisuzzaman, S. Antioxidant activity and total phenolic content of an isolated *Morinda citrifolia* L. methanolic extract from Poly-ethersulphone (PES) membrane separator. *J. King Saud Univ. Eng. Sci.* 2015, 27, 63-67.
3. Yang, J.; Paulino, R.; Janke-Stedronsky, S.; Abawi, F. Free-radical-scavenging activity and total phenols of noni (*Morinda citrifolia* L.) juice and powder in processing and storage. *Food Chem.* 2007, 102, 302-308.
4. Yang, J.; Gadi, R.; Paulino, R.; Thomson, T. Total phenolics, ascorbic acid, and antioxidant capacity of noni (*Morinda citrifolia* L.) juice and powder as affected by illumination during storage. *Food Chem.* 2010, 122, 627-632.
5. Sirilun, S.; Sivamaruthi, B. S.; Kesika, P.; Makhamrueang, N.; Chaiyasut, K.; Peerajan, S.; and Chaiyasut, C. Development and evaluation of Mustard green pickled liquid as starter for *Morinda citrifolia* Linn. Fermentation. *Int. Food Res. J.* 2017, 24, 2170–2176.
6. Sina, H.; Dramane, G.; Tchekounou, P.; Assogba, M.; Chabi-Sika, K.; Boya, B.; Socohou, A.; Adjanohoun, A. and Baba-Moussa, L. Phytochemical composition and in vitro biological activities of *Morinda citrifolia* fruit juice. *Saudi J. Biol. Sci.* 2021, 28, 1331-1335.
7. Brand-Williams, W.; Cuvelier, M.; Berset, C. Use of a free radical method to evaluate antioxidant activity. *LWT - Food Sci Technol* 1995, 28, 25-30.
8. Samarasiri, M.; Chandrasiri, T.; Wijesinghe, D.; Gunawardena, S. Antioxidant Capacity and Total Phenolic Content Variations
9. Székely, G.; Rizzo, M.; Bakirov, N. Measuring and testing dependence by correlation of distances. *Ann. Stat.* 2007, 35.
10. Konsue, N.; Yimthiang, S.; & Kwanhian, W. Effect of fermentation conditions of noni (*Morinda citrifolia* L.) juice on glutathione content and lipid oxidation in vero cells. *Int. Food Res. J.* 2018, 25, 1534–1540.

# Thank You !

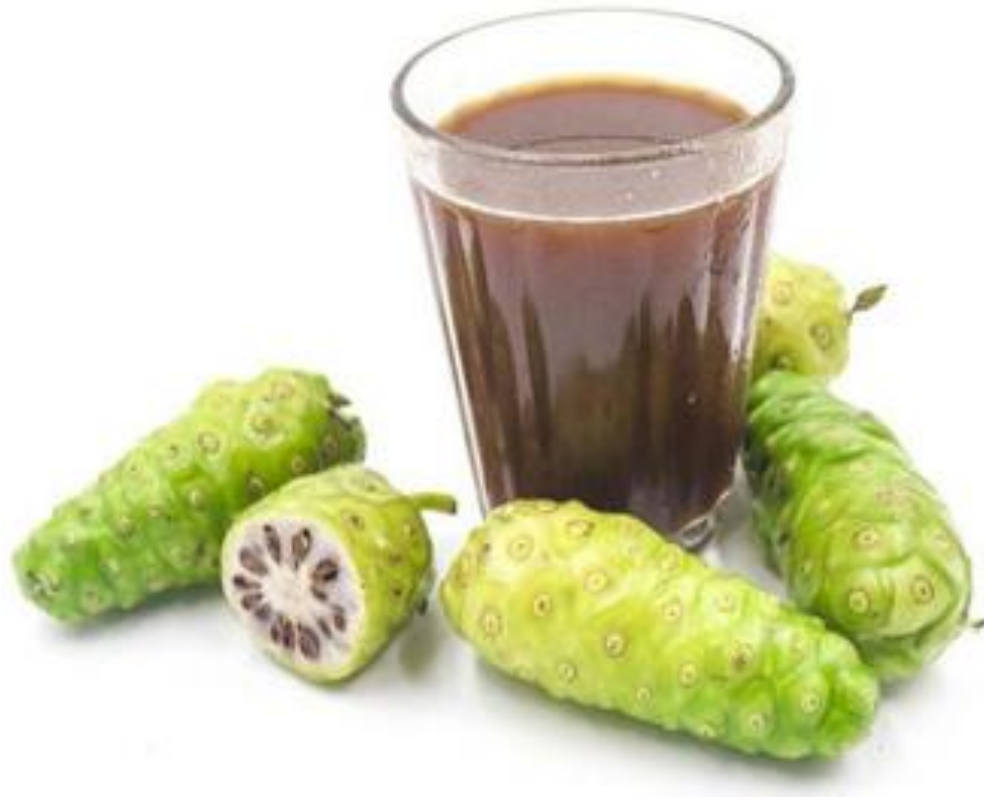

Supplement: s1 [file s1]
